# Supplementary material for: Removal of Toxic and Essential Nutrient Elements from Commercial Rice Brands Using Different Washing and Cooking Practices: Human Health Risk Assessment
Source: MDPI journal article supplement (doi:10.3390/ijerph19052582), 2022-02-23
Supplement: s1 [file s1]

## **Supplementary Information**

### **Removal of toxic and essential nutrient elements from commercial rice brands using different washing and cooking practices: Human health risk assessment**

Syfullah Shahriar<sup>1,2\*</sup> • Alok Kumar Paul<sup>2</sup> • Mohammad Mahmudur Rahman<sup>1,\*</sup>

<sup>1</sup>Global Centre for Environmental Remediation (GCER), College of Engineering, Science and Environment, The University of Newcastle, Callaghan, NSW 2308, Australia

<sup>2</sup>Department of Soil Science, Sher-e-Bangla Agricultural University, Dhaka 1207, Bangladesh

\*Corresponding author

E-mail address: mahmud.rahman@newcastle.edu.au (M.M. Rahman);

Syfullah.shahriar@uon.edu.au (S. Shahriar)

### **Digestion and analysis of food samples**

Briefly, powdered rice samples (0.5 g) were weighed and placed into prewashed 100 ml glass digestion tubes and 5 ml concentrated nitric acid (trace analytical grade, 70%, Fisher Chemical) was added into each tube and the solution mixtures were placed inside a fume hood overnight. The tubes were heated for 5 to 6 hours at 140 °C temperature in a block Digester (Seal BD 50) until only a few ml of residual solutions were left in the tubes. Following digestion, tubes were removed and allowed to cool at room temperature. Once cool, samples were diluting to 10 ml with 0.1% nitric acid solution. The diluted samples were mixed thoroughly with a vortex mixer and then filtered using a 0.45µm syringe filter (cellulose acetate, Minisart) into 10 ml plastic tubes. The diluted samples were stored in a refrigerator at 4°C until analysed by the inductively coupled plasma mass spectrometry (ICP-MS, 7900, Agilent Technologies, Japan) for TEs and nutrient elements.

### **Health risk assessment**

To assess the non-carcinogenic human health risks from the exposure of TEs, we used US EPA hazard quotient (HQ) [49]. The HQ value is the ratio of estimated daily intake of a TE to its oral reference dose (Rfd).

$$HQ = \frac{EDI}{Rfd}$$

The RfDs of As, Cd and Pb were 0.3, 1 and 12.5 (µg/kg/day), respectively [50,51]. HQ values  $\leq 1$  indicates no obvious risk from the TEs to the exposed population over a lifetime exposure, while HQ values  $> 1$  depicts the chance of occurrence of non-carcinogenic risk.

The incremental lifetime cancer risk (ILCR) from ingestion of TEs was calculated using the following equation:

$$ILCR = EDI \times SF.$$

Where SF is the oral slope factor of the TEs. The slope factor for As, Cd and Pb are 1.5, 0.38 and  $8.5 \times 10^{-3}$  mg/kg/day [52-54].

**Table S1.** Grain characteristics of selected brands of rice.

| Rice Variety   | Grain characters                                            |
|----------------|-------------------------------------------------------------|
| BR 22          | Grain: short, bold, translucent                             |
| Banshful       | Aromatic (grain: coarse, short)                             |
| Hybrid Heera 1 | Salt tolerant (grain: medium coarse, short)                 |
| BRRIdhan 50    | Aromatic, protein content 8.2% (grain: long slender, white) |
| BRRIdhan 28    | High yielding (grain: medium slender, white)                |
| Paijam         | Aromatic (grain: fine)                                      |
| Jirashail      | Grain: fine, slender, white                                 |
| BRRIdhan 34    | Aromatic (grain: white, short, bold)                        |
| Binni rice     | Aromatic (grain: opaque, sticky)                            |
| Katarivogh     | Aromatic (grain: fine)                                      |

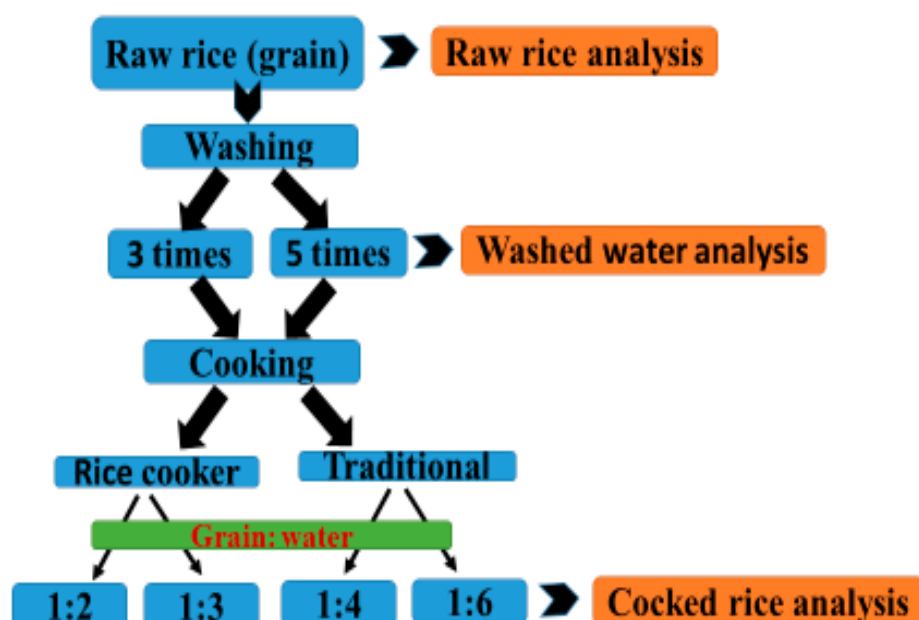**Figure S1.** Flow chart of washing and cooking procedures

**Table S2.** Concentrations (µg/kg) of TEs and nutrient elements in SRMs.

| SRM1568b (Rice flour) |                 |                | SRM1573a (Trace elements in tomato leaves) |                 |                | SRM1570a (Trace elements in spinach leaves) |                 |                |            |
|-----------------------|-----------------|----------------|--------------------------------------------|-----------------|----------------|---------------------------------------------|-----------------|----------------|------------|
| Elements              | Certified value | Observed value | % Recovery                                 | Certified value | Observed value | % Recovery                                  | Certified value | Observed value | % Recovery |
| As                    | 285 ± 14        | 311 ± 7        | 109                                        | 112.6 ± 2.4     | 108.4 ± 5.2    | 96.2                                        | 68 ± 12         | 63 ± 9         | 92.6       |
| Cd                    | 22.4 ± 1.3      | 21.2 ± 1.1     | 94                                         | 1517 ± 27       | 1430 ± 68      | 94.3                                        | 2876 ± 58       | 2692 ± 88      | 93.6       |
| Pb                    | -               | 27 ± 8         | -                                          | -               | 1390 ± 60      | -                                           | 200*            | 230 ± 18       | 115        |
| Zn                    | 19420 ± 260     | 17113 ± 117    | 88                                         | 30940 ± 550     | 28330 ± 840    | 91.5                                        | 82300 ± 3900    | 77600 ± 5400   | 94.3       |
| Cu                    | 2350 ± 160      | 2197 ± 11      | 93                                         | 4700 ± 140      | 5100 ± 210     | 108.5                                       | 12220 ± 860     | 13130 ± 1080   | 107.4      |
| Mn                    | 19200 ± 1800    | 18210 ± 207    | 94                                         | 246300 ± 7100   | 248860 ± 9200  | 101.0                                       | 76000 ± 1200    | 68900 ± 1560   | 90.6       |
| Se                    | 365 ± 29        | 398 ± 24       | 109                                        | 54.3 ± 2.0      | 49.7 ± 6.3     | 91.5                                        | 115.2 ± 4.3     | 109.6 ± 5.4    | 95.1       |
| Mo                    | 1451 ± 48       | 1220 ± 31      | 84                                         | 460*            | 390 ± 20       | 84.8                                        | -               | 408.5 ± 10.2   | -          |

\*information only
